# Supplementary material for: C-reactive Protein to Albumin Ratio as a Prognostic Biomarker in Patients with Esophageal Squamous Cell Carcinoma Receiving Immune Checkpoint Inhibitor- based Therapy
Source: Research Square preprint supplement (doi:10.21203/rs.3.rs-8463955/v1), 2026-01-22
Supplement: Supplementary file 3 [file 38d1960041a6ad7f85477d8f.xlsx]

## Sheet: Table S5
Supplementary Table S5. Subsequent therapy
Table S5a. Nivolumab monotherapy cohort
Subsequent therapy	No. of total patients (%) n = 102	CAR < 0.072 (%) n = 35	CAR ≥ 0.072 (%) n = 67	p value
Best supportive care	60 (59%)	13 (37%)	47 (70%)	0.002
Chemotherapy	42 (41%)	22 (63%)	20 (30%)	0.002
Paclitaxcel	37 (36%)	18 (51%)	21 (31%)
Docetaxel	2 (2%)	1 (3%)	1 (1%)
Clinical trials	3 (3%)	3 (9%)	0
Table S5b. First-line chemo plus ICI cohort
Subsequent therapy	No. of total patients (%) n = 49	CAR < 0.090 (%) n = 20	CAR ≥ 0.090 (%) n = 29	p value
Best supportive care	14 (29%)	1 (5%)	13 (45%)	0.003
Chemotherapy	26 (53%)	14 (70%)	12 (41%)	0.08
Paclitaxcel	23 (47%)	13 (65%)	10 (34%)
Clinical trials	3 (6%)	1 (5%)	2 (7%)
Chemoradiotherapy	5 (10%)	3 (15%)	2 (7%)	0.64
Radiation	3 (6%)	1 (5%)	2 (7%)	1
Operation	1 (2%)	1 (5%)	0	0.41
Table S5c. First-line nivo plus ipi cohort
Subsequent therapy	No. of total patients (%) n = 25	CAR < 0.090 (%) n = 10	CAR ≥ 0.090 (%) n = 15	p value
Best supportive care	9 (36%)	2 (20%)	7 (47%)	0.23
Chemotherapy	16 (64%)	8 (80%)	8 (53%)	0.23
Paclitaxcel	11 (44%)	5 (50%)	6 (40%)
FOLFOX	4 (16%)	2 (20%)	2 (13%)
TAS102	1 (4%)	1 (10%)	0
Abbreviations
CAR, C-reactive protein to albumin ratio
Chemo, chomotherapy
ICI, immune checkpoint inhibitor
nivo plus ipi, nivolumab plus ipilimumab
