# Supplementary material for: C-reactive Protein to Albumin Ratio as a Prognostic Biomarker in Patients with Esophageal Squamous Cell Carcinoma Receiving Immune Checkpoint Inhibitor- based Therapy
Source: Research Square preprint supplement (doi:10.21203/rs.3.rs-8463955/v1), 2026-01-22
Supplement: Supplementary file 5 [file 3ae331647a4451cac7332014.xlsx]

## Sheet: Table S3
Supplementary Table S3. Safety
Table S3a. Nivolumab monotherapy cohort
Adverse events	Any grade (%)	Grade ≥ 3	CAR < 0.072 group (No. of grade ≥ 3) n = 38	CAR ≥ 0.072 group (No. of grade ≥ 3) n = 69	p value
Pneumonitis	7 (6%)	0 (0%)	2 (0)	5 (0)	1
Dermatitis	4 (4%)	2 (2%)	1 (1)	3 (1)	1
dermatomyositis	1 (1%)	0 (0%)	0 (0)	1 (0)	1
Arthritis	1 (1%)	0 (0%)	1 (0)	0 (0)	0.36
Cystitis	1 (1%)	1 (1%)	1 (1)	0 (0)	0.36
Colitis	1 (1%)	0 (0%)	0 (0)	1 (0)	1
Eosinophilia	1 (1%)	0 (0%)	1 (0)	0 (0)	0.36
Hepatitis	1 (1%)	1 (1%)	0 (0)	1 (1)	1
Pleurisy	1 (1%)	1 (1%)	1 (1)	0 (0)	0.36
Total	18 (17%)	5 (5%)	7 (3)	11 (2)	0.79
Table S3b. First-line chemo plus ICI cohort
Adverse events	Any grade (%)	Grade ≥ 3	CAR < 0.090 group (No. of grade ≥ 3) n = 25	CAR ≥ 0.090 group (No. of grade ≥ 3) n = 35	p value
Anorexia	34 (57%)	0 (0%)	19 (0)	15 (0)	0.02
Constipation	10 (17%)	0 (0%)	6 (0)	4 (0)	0.29
Diarrhea	3 (5%)	1 (2%)	2 (1)	1 (0)	0.57
Stomatitis	3 (5%)	0 (0%)	2 (0)	1 (0)	0.57
Fatigue	3 (5%)	0 (0%)	1 (0)	2 (0)	1
Neutropenia	15 (25%)	8 (13%)	6 (6)	9 (2)	1
irAEs
Hypothyroidism	6 (10%)	0 (0%)	4 (0)	2 (0)	0.36
Pneumonia	3 (5%)	2 (3%)	2 (2)	1 (0)	0.57
Dermatitis	2 (3%)	1 (2%)	1 (0)	1 (1)	1
Hepatitis	1 (2%)	1 (2%)	0 (0)	1 (1)	1
Hemolytic anemia	1 (2%)	1 (2%)	0 (0)	1 (1)	1
Adrenal insufficiency	3 (5%)	0 (0%)	2 (0)	1 (0)	0.57
Uveitis	1 (2%)	0 (0%)	0 (0)	1 (0)	1
irAEs total	16* (27%)	5 (8%)	9 (2)	8 (3)	0.38
Table S3c. First-line nivo plus ipi cohort
Adverse events	Any grade (%)	Grade ≥ 3	CAR < 0.090 group (No. of grade ≥ 3) n= 15	CAR ≥ 0.090 group (No. of grade ≥ 3) n = 17	p value
Dermatitis	4 (13%)	1 (3%)	3 (1)	1 (0)	0.32
Colitis	4 (13%)	2 (6%)	3 (1)	1 (1)	0.32
Hypothyroidism	2 (6%)	0 (0%)	1 (0)	1 (0)	1
Pneumonia	2 (6%)	0 (0%)	0 (0)	2 (0)	0.49
Hepatitis	3 (9%)	3 (9%)	1 (1)	2 (2)	1
Adrenal insufficiency	2 (6%)	0 (0%)	1 (0)	1 (0)	1
Myalgias	1 (3%)	1 (3%)	1 (1)	0 (0)	0.46
Myositis	1 (3%)	1 (3%)	1 (1)	0 (0)	0.46
Myocarditis	1 (3%)	0 (0%)	1 (0)	0 (0)	0.46
Cystitis	1 (3%)	0 (0%)	1 (0)	0 (0)	0.46
Total	17* (53%)	8 (25%)	13 (5)	8 (3)	0.03
*Excluding duplicate cases
Abbreviations
CAR, C-reactive protein to albumin ratio
Chemo, chomotherapy
ICI, immune checkpoint inhibitor
irAEs, immune-related adverse events
nivo plus ipi, nivolumab plus ipilimumab
