# Supplementary material for: C-reactive Protein to Albumin Ratio as a Prognostic Biomarker in Patients with Esophageal Squamous Cell Carcinoma Receiving Immune Checkpoint Inhibitor- based Therapy
Source: Research Square preprint supplement (doi:10.21203/rs.3.rs-8463955/v1), 2026-01-22
Supplement: Supplementary file 6 [file 524bf6c8333c6efa30ce4ea0.xlsx]

## Sheet: Table 1
Table 1a. Patient caracteristics in the nivolumab monotherapy cohort						Table 1b. Patient caracteristics in the first-line ICI-based treatment cohort
	Nivolumab monotherapy cohort						1st-line treatment cohort	1st-line Chemo + ICI cohort				1st-line Nivolumab + Ipilimumab cohort
Characteristics	No. of total patients (%) n = 107	CAR< 0.072 group (%) n = 38	CAR≥ 0.072 group (%) n = 69	p value		Characteristics	No. of tota patients (%) n = 92	No. of patients (%) n = 60	CAR < 0.090 group (%) n = 25	CAR ≥ 0.090 group (%) n = 35	p value	No. of total patients (%) n = 32	CAR < 0.090 group (%) n = 15	CAR ≥ 0.090 group (%) n = 17	p value
Age				0.8		Age					0.33				0.41
Median [range], y	68 [43–83]	66 [52–81]	66 [43–83]			Median [range], y	66 [42–88]	65 [42–79]	65 [42–79]	63 [47–79]		71 [48–88]	70 [48–84]	67 [48–88]
Sex				0.462		Sex					0.77				0.04
Male	84(79)	28 (74)	56 (81)			Male	67(73)	43 (72)	17 (68)	26 (74)		24 (75)	14 (93)	10 (59)
Female	23(21)	10 (26)	13 (19)			Female	25(27)	17 (28)	8 (32)	9 (26)		8 (25)	1 (7)	7 (41)
BSA				0.4		BSA					0.43				0.49
Median [range], m2	1.55 [1.11–1.93]	1.58 [1.23–1.93]	1.55 [1.11–1.87]			Median [range], m2	1.59 [1.26–2.16]	1.60 [1.27–2.16]	1.58 [1.27–2.16]	1.61 [1.27–1.78]		1.56 [1.26–1.85]	1.59 [1.26–1.85]	1.55 [1.26–1.75]
ECOG PS				0.001		ECOG PS					<0.001				0.07
0	46 (44)	25 (66)	21 (30)			0	54 (59)	33 (55)	21 (84)	12 (34)		21 (66)	13 (87)	8 (47)
1	48 (44)	12 (32)	36 (52)			1	32 (35)	25 (42)	4 (16)	21 (60)		7 (22)	1 (7)	6 (35)
2	13 (12)	1 (3)	12 (17)			2	6 (6)	2 (3)	0 (0)	2 (6)		4 (13)	1 (7)	3 (18)
Primary site				0.3		Primary site					0.51				0.24
Ce	13 (12)	3 (8)	10 (15)			Ce	13 (14)	8 (13)	4 (16)	4 (11)		5 (16)	4 (27)	1 (6)
Ut	30 (28)	10 (26)	20 (29)			Ut	20 (22)	13 (22)	6 (24)	7 (20)		7 (22)	4 (27)	3 (18)
Mt	40 (38)	19 (50)	21 (30)			Mt	35 (38)	20 (33)	7 (28)	13 (37)		15 (47)	6 (40)	9 (53)
Lt	23 (21)	6 (16)	17 (25)			Lt	22 (24)	17 (28)	6 (24)	11 (31)		5 (16)	1 (7)	4 (24)
Ae	1 (1)	0 (0)	1 (1)			Ae	2 (2)	2 (3)	2 (8)	0 (0)		0 (0)	0 (0)	0 (0)
Disease status				0.07		Disease status					0.17				0.5
Unresectable	47 (43)	12 (32)	35 (51)			Unresectable	57 (62)	42 (70)	15 (60)	27 (77)		15 (47)	6 (40)	9 (53)
Reccurent	60 (57)	26 (68)	34 (49)			Reccurent	35 (38)	18 (30)	10 (40)	8 (23)		17 (53)	9 (60)	8 (47)
Treatment line				0.68		Regimen					0.6				1
2	95 (87)	33 (87)	60 (87)			FP+Pembrolizumab	27 (29)	27 (45)	10 (40)	17 (49)		0	0	0
3	12 (11)	5 (13)	7 (10)			FP+Nivolumab	33 (36)	33 (55)	15 (60)	18 (51)		0	0	0
4	2 (2)	0 (0)	2 (3)			Nivolumab+Ipilimumab	32 (35)	0 (0)	0	0		32 (100)	15 (100)	17 (100)
No. of metastasis				0.56		No. of metastasis					0.27				0.56
1	45 (41)	16 (42)	29 (42)			1	46 (50)	27 (45)	13 (52)	14 (40)		19 (91)	11 (73)	8 (47)
2	29 (28)	14 (37)	15 (22)			2	29 (32)	24 (40)	11 (44)	13 (37)		5 (28)	2 (13)	3 (18)
≥3	33 (31)	8 (21)	25 (36)			≥3	17 (18)	9 (15)	1 (4)	8 (23)		8 (16)	2 (13)	6 (35)
Metastatic Organ						Metastatic Organ
Lymph nodes	89 (83)	32 (84)	57 (83)	1		Lymph nodes	77 (84)	48 (80)	19 (76)	29 (83)	0.53	29 (91)	13 (100)	16 (94)	0.59
Lung	46 (43)	17 (45)	29 (42)	0.84		Lung	24 (26)	15 (25)	7 (28)	8 (23)	0.77	9 (28)	3 (20)	6 (35)	0.44
Liver	31 (29)	10 (26)	21 (30)	0.82		Liver	16 (17)	11 (18)	2 (8)	9 (26)	0.1	5 (16)	2 (13)	3 (18)	1
History of esophagectomy				0.31		History of esophagectomy					0.21				1
Presence	43 (41)	18 (47)	25 (36)			Presence	26 (28)	12 (20)	7 (28)	5 (14)		14 (44)	7 (47)	7 (41)
Absence	64 (59)	20 (53)	44 (64)			Absence	66 (72)	48 (80)	18 (72)	30 (86)		18 (56)	8 (53)	10 (59)
History of radiotherapy				0.81		History of radiotherapy					1				1
Presence	85 (79)	31 (82)	54 (78)			Presence	7 (8)	5 (8)	2 (8)	3 (9)		2 (6)	1 (7)	1 (6)
Absence	22 (21)	7 (18)	15 (22)			Absence	85 (92)	55 (92)	23 (92)	32 (91)		30 (94)	14 (93)	16 (94)
PD-L1				1		PD-L1					0.94				0.22
NA	100 (94)	36 (95)	64 (93)			NA	37 (40)	31 (52)	12 (48)	19 (54)		6 (19)	2 (13)	4 (24)
TPS < 1	4 (4)	1 (3)	3 (4)			TPS < 1	35 (38)	17 (28)	8 (32)	9 (26)		18 (56)	7 (47)	11 (65)
TPS > 1	3 (3)	1 (3)	2 (3)			TPS > 1	20 (22)	12 (20)	5 (20)	7 (20)		8 (25)	6 (40)	2 (12)
Abbreviations
BSA, body surface area
CAR, C-reactive protein to alubumin ratio
ECOG PS, Eastern Cooperative Oncology Group Performance Status
FP, fluoropyrimidine plus cisplatin
NA, not assessed
No., number
PD-L1. programmed cell death-ligand1
TPS, tumor population score
y, years
