# Supplementary material for: C-reactive Protein to Albumin Ratio as a Prognostic Biomarker in Patients with Esophageal Squamous Cell Carcinoma Receiving Immune Checkpoint Inhibitor- based Therapy
Source: Research Square preprint supplement (doi:10.21203/rs.3.rs-8463955/v1), 2026-01-22
Supplement: Supplementary file 8 [file 5c4e25c0e06fd4b9841dafd4.xlsx]

## Sheet: Table S1
Supplementary Table S1. Best response
Table S1a. Nivolumab monotherapy cohort						Table S1b. Higher CAR group of the nivolumab monotherapy cohort
Best response	No. of total patients (%) n = 107	CAR < 0.072 group (%) n = 38	CAR ≥ 0.072 group (%) n = 69	p value		Best response	No. of total patients (%) n = 61	CAR ≥ 0.072 and dCAR < 0.42 group (%) n = 40	CAR ≥ 0.072 and dCAR ≥ 0.42 group (%) n = 21	p value
Complete response	1 (1%)	1 (3%)	0 (0%)			Complete response	0 (0%)	0 (0%)	0 (0%)
Partial response	29 (27%)	12 (32%)	17 (25%)			Partial response	17 (28%)	16 (40%)	1 (5%)
Stable disease	23 (21%)	14 (37%)	9 (13%)			Stable disease	9 (15%)	7 (18%)	2 (10%)
Progressive disease	48 (45%)	11 (29%)	37 (54%)			Progressive disease	35 (57%)	17 (43%)	18 (86%)
Not evaluable	6 (6%)	0 (0%)	6 (9%)			Not evaluable	0 (0%)	0 (0%)	0 (0%)
Response rate (CR+PR)	0.28	0.34	0.25	0.5		Response rate (CR+PR)	0.28	0.4	0.05	0.003
Disease control rate (CR+PR+SD)	0.5	0.71	0.38	0.001		Disease control rate (CR+PR+SD)	0.43	0.58	0.14	0.001
Table S1c. First-line chemo plus ICI cohort						Table S1d. Higher CAR group of the first-line chemo plus ICI cohort
Best response	No. of total patients (%) n = 60	CAR < 0.090 group (%) n = 25	CAR ≥ 0.090 group (%) n = 35	p value		Best response	No. of total patients (%) n = 33	CAR ≥ 0.090 and dCAR < -0.20 group (%) n = 14	CAR ≥ 0.090 and dCAR ≥ -0.20 group (%) n = 19	p value
Complete response	3 (5%)	1 (4%)	2 (6%)			Complete response	2 (6%)	2 (14%)	0 (0%)
Partial response	25 (42%)	13 (52%)	12 (34%)			Partial response	12 (36%)	5 (36%)	7 (37%)
Stable disease	19 (32%)	7 (28%)	12 (34%)			Stable disease	12 (36%)	5 (36%)	7 (37%)
Progressive disease	11 (18%)	3 (12%)	8 (23%)			Progressive disease	7 (21%)	2 (14%)	5 (26%)
Not evaluable	2 (3%)	1 (4%)	1 (3%)			Not evaluable	0 (0%)	0 (0%)	0 (0%)
Response rate (CR+PR)	0.47	0.56	0.4	0.3		Response rate (CR+PR)	0.42	0.5	0.37	0.5
Disease control rate (CR+PR+SD)	0.78	0.84	0.74	0.53		Disease control rate (CR+PR+SD)	0.79	0.86	0.74	0.67
Table S1e. First-line nivo plus ipi cohort						Table S1f. Higher CAR group of the first-line nivo plus ipi cohort
Best response	No. of total patients (%) n = 32	CAR < 0.090 group (%) n = 15	CAR ≥ 0.090 group (%) n = 17	p value		Best response	No. of total patients (%) n = 14	CAR ≥ 0.090 and dCAR < -0.20 group (%) n = 7	CAR ≥ 0.090 and dCAR ≥ -0.20 group (%) n = 7	p value
Complete response	1 (3%)	1 (7%)	0 (0%)			Complete response	0 (0%)	0 (0%)	0 (0%)
Partial response	8 (25%)	3 (20%)	5 (29%)			Partial response	5 (36%)	4 (57%)	1 (14%)
Stable disease	11 (34%)	6 (40%)	5 (29%)			Stable disease	4 (29%)	1 (14%)	3 (43%)
Progressive disease	12 (38%)	5 (33%)	7 (41%)			Progressive disease	5 (36%)	2 (29%)	3 (43%)
Not evaluable	0 (0%)	0 (0%)	0 (0%)			Not evaluable	0 (0%)	0 (0%)	0 (0%)
Response rate (CR+PR)	0.28	0.27	0.29	1		Response rate (CR+PR)	0.36	0.57	0.14	0.27
Disease control rate (CR+PR+SD)	0.63	0.67	0.59	0.73		Disease control rate (CR+PR+SD)	0.64	0.71	0.57	1
Abbreviations
CAR, C-reactive protein to albumin ratio
Chemo, chemotherapy
CR, complete response
dCAR, delta C-reactive protein to albumin ratio
nivo plus ipi, nivolumab plus ipilimumab
PD, progressive disease
PR, partial response
SD, stable disease
