# Supplementary material for: C-reactive Protein to Albumin Ratio as a Prognostic Biomarker in Patients with Esophageal Squamous Cell Carcinoma Receiving Immune Checkpoint Inhibitor- based Therapy
Source: Research Square preprint supplement (doi:10.21203/rs.3.rs-8463955/v1), 2026-01-22
Supplement: Supplementary file 10 [file 8b38a6c3e41cc1f9b590ea04.xlsx]

## Sheet: Table S4
Supplementary Table S4. Reasons for treatment discontinuation
Table S4a. Nivolumab monotherapy cohort
Reasons for discontinuation	No. of total patients (%) n = 102*	CAR < 0.072 (%) n = 35	CAR ≥ 0.072 (%) n = 67	p value
Progressive disease	91 (89%)	28 (80%)	63 (94%)	0.04
irAE	7 (7%)	4 (11%)	3 (4%)	0.23
Poor PS	4 (4%)	3 (9%)	1 (2%)	0.12
* 5 patients ongoing
Table S4b. First-line chemo plus ICI cohort
Reasons for discontinuation	No. of total patients (%) n = 49*	CAR < 0.090 (%) n = 20	CAR ≥ 0.090 (%) n = 29	p value
Progressive disease	44 (90%)	20 (100%)	24 (83%)	0.07
Operation	1 (2%)	0 (0%)	1 (3%)	1
Poor PS	1 (2%)	0 (0%)	1 (3%)	1
Pulmonary embolism	1 (2%)	0 (0%)	1 (3%)	1
Patinent's choice	2 (4%)	0 (0%)	2 (7%)	0.51
* 11 patients ongoing
Table S3c. First-line nivo plus ipi cohort
Reasons for discontinuation	No. of total patients (%) n = 25*	CAR < 0.090 (%) n = 9	CAR ≥ 0.090 (%) n = 16	p value
Progressive disease	20 (80%)	7 (78%)	13 (81%)	1
irAE	4 (16%)	1 (11%)	3 (19%)	1
Patient's choice	1 (4%)	1 (11%)	0 (7%)	0.36
* 7 patients ongoing
Abbreviations
CAR, C-reactive protein to albumin ratio
Chemo, chomotherapy
ICI, immune checkpoint inhibitor
irAEs, immune related adverse events
nivo plus ipi, nivolumab plus ipilimumab
