# Supplementary material for: C-reactive Protein to Albumin Ratio as a Prognostic Biomarker in Patients with Esophageal Squamous Cell Carcinoma Receiving Immune Checkpoint Inhibitor- based Therapy
Source: Research Square preprint supplement (doi:10.21203/rs.3.rs-8463955/v1), 2026-01-22
Supplement: Supplementary file 11 [file a4055294ec2598b921af5a24.xlsx]

## Sheet: Table S2
Supplementary Table S2. Cox proportional hazards analysis of PFS
Nivolumab monotherapy cohort	Univariate analysis					Multivariate analysis
PFS	HR	Lower 95% CI	Upper 95% CI	P value		HR	Lower 95% CI	Upper 95% CI	P value
Sex (female* or male)	0.99	0.61	1.61	0.98
Age (< 65* or ≥ 65 years)	0.8	0.54	1.2	0.29
BSA (< 1.553* or ≥ 1.553 m2)	0.99	0.67	1.48	0.97
ECOG PS (0,1* or 2 ≥)	1.22	0.71	2.1	0.46
No. of metastatic organs, (1,2* or 3 ≥)	2.14	1.39	3.3	< 0.001		1.92	1.1	3.32	0.021
Liver metastasis (absent* or present)	1.69	1.09	2.61	0.019		1.11	0.63	1.97	0.71
No. of previous chemotherapy (1* or 2 ≥)	0.92	0.5	1.69	0.79
Disease status (advanced* or recurrent)	0.61	0.41	0.91	0.016		0.76	0.49	1.18	0.22
PPI p.o (absent* or present)	1.1	0.69	1.75	0.69
CAR (< 0.072* or ≥ 0.072)	2	1.3	3.09	0.0018		1.8	1.13	2.84	0.012
First-line treatment cohort	Univariate analysis					Multivariate analysis
PFS	HR	Lower 95% CI	Upper 95% CI	P value		HR	Lower 95% CI	Upper 95% CI	P value
Sex (female* or male)	0.68	0.41	1.13	0.13
Age (< 65* or ≥ 65 years)	1.23	0.78	1.95	0.38
BSA (< 1.59* or ≥ 1.59 m2)	0.66	0.41	1.04	0.07
ECOG PS (0,1* or 2 ≥)	7.76	3.15	19.11	< 0.001		5.89	2.25	15.4	< 0.001
No. of metastatic organs, (1,2* or 3 ≥)	1.35	0.75	2.41	0.32
Liver metastasis (absent* or present)	2.09	1.17	3.74	0.01		1.63	0.86	3.07	0.13
Disease status (advanced* or recurrent)	0.75	0.47	1.22	0.25
Treatment (ICI plus chemo* vs nivo plus ipi)	1.61	0.98	2.65	0.058
PD-L1 TPS (< 1* or 1 ≥)	0.53	0.27	1.02	0.059
CAR (< 0.090* or ≥ 0.090)	1.48	0.93	2.36	0.096
*Reference
Abbreviations
BSA, body surface area
CAR, C-reactive protein to albumin ratio
Chemo, chomotherapy
CI, confidence interval
ECOG PS, Eastern Cooperative Oncology Group performance status
HR, Hazard ratio
ICI, immune checkpoint inhibitor
nivo plus ipi, nivolumab plus ipilimumab
OS, overall survival
PPI p.o, proton pump inhibitors, per os (oral administration)
TPS, tumor population score
