# Supplementary material for: C-reactive Protein to Albumin Ratio as a Prognostic Biomarker in Patients with Esophageal Squamous Cell Carcinoma Receiving Immune Checkpoint Inhibitor- based Therapy
Source: Research Square preprint supplement (doi:10.21203/rs.3.rs-8463955/v1), 2026-01-22
Supplement: Supplementary file 13 [file d3488534eb87a41d64cb575c.xlsx]

## Sheet: Table 2
Table 2. Cox proportional hazards analysis of OS
Table 2a. Nivolumab monotherapy cohort
Nivolumab monotherapy cohort	Univariate analysis					Multivariate analysis
OS	HR	Lower 95% CI	Upper 95% CI	P value		HR	Lower 95% CI	Upper 95% CI	P value
Sex (female* or male)	0.98	0.96	1.01	0.11
Age (< 65* or ≥ 65 years)	0.8	0.5	1.26	0.33
BSA (< 1.553* or ≥ 1.553 m2)	0.56	0.35	0.9	0.02		0.6	0.36	1.01	0.053
ECOG PS (0,1* or 2 ≥)	2.61	1.47	4.63	0.001		1.53	0.82	2.88	0.19
No. of metastatic organs, (1,2* or 3 ≥)	1.66	1.02	2.69	0.04		1.73	1.03	2.9	0.04
Liver metastasis (absent* or present)	1.47	0.9	2.4	0.12
No. of previous chemotherapy (1* or 2 ≥)	1.265	0.73	2.18	0.4
Disease status (advanced* or recurrent)	0.599	0.38	0.95	0.03		0.76	0.47	1.24	0.27
PPI p.o (Absent* or Present)	1.91	1.06	3.43	0.03		1.6	0.88	2.92	0.13
CAR (< 0.072* or ≥ 0.072)	3.09	1.84	5.21	<0.001		2.36	1.35	4.12	0.002
Table 2b. First-line ICI-based treatment cohort
First-line ICI-based treatment cohort	Univariate analysis					Multivariate analysis
OS	HR	Lower 95% CI	Upper 95% CI	P value		HR	Lower 95% CI	Upper 95% CI	P value
Sex (female* or male)	0.68	0.37	1.23	0.2
Age (< 65* or ≥ 65 years)	1.49	0.83	2.69	0.18
BSA (< 1.59* or ≥ 1.59 m2)	0.74	0.41	1.31	0.3
ECOG PS (0,1* or 2 ≥)	11.3	4.37	29.1	<0.001		7.11	2.44	20.7	<0.001
No. of metastatic organs, (1,2* or 3 ≥)	1.71	0.87	3.38	0.12
Liver metastasis (absent* or present)	2.66	1.35	5.24	0.005		1.47	0.66	3.26	0.34
Disease status (advanced* or recurrent)	0.6	0.32	1.12	0.11
Treatment (ICI plus chemo* vs. nivo plus ipi)	1.03	0.55	1.95	0.92
PD-L1 TPS (< 1* or 1 ≥)	1.15	0.49	2.7	0.75
CAR (< 0.090* OR ≥ 0.090)	2.74	1.46	5.15	0.002		2.38	1.24	4.56	0.009
*Reference
Abbreviations
BSA, body surface area
CAR, C-reactive protein to alubumin ratio
Chemo, chemotherapy
CI, confidence interval
ECOG PS, Eastern Cooperative Oncology Group performance status
HR, Hazard ratio
ICI, immune checkpoint inhibitor
nivo plus ipi, nivolumab plus ipilimumab
OS, overall survival
PPI p.o, proton pump inhibitors, per os (oral administration)
TPS, tumor population score
